# Supplementary material for: An epilepsy-associated CILK1 variant compromises KATNIP regulation and impairs primary cilia and Hedgehog signaling
Source: PubMed Central journal article supplement — bioRxiv. 2024 May 17:2024.05.14.594243. Preprint. [Version 1] doi: 10.1101/2024.05.14.594243 (PMC11118389; doi:10.1101/2024.05.14.594243), 2024-05-17
Supplement: NIHPP2024.05.14.594243v1-supplement-1.pdf [file NIHPP2024.05.14.594243v1-supplement-1.pdf]

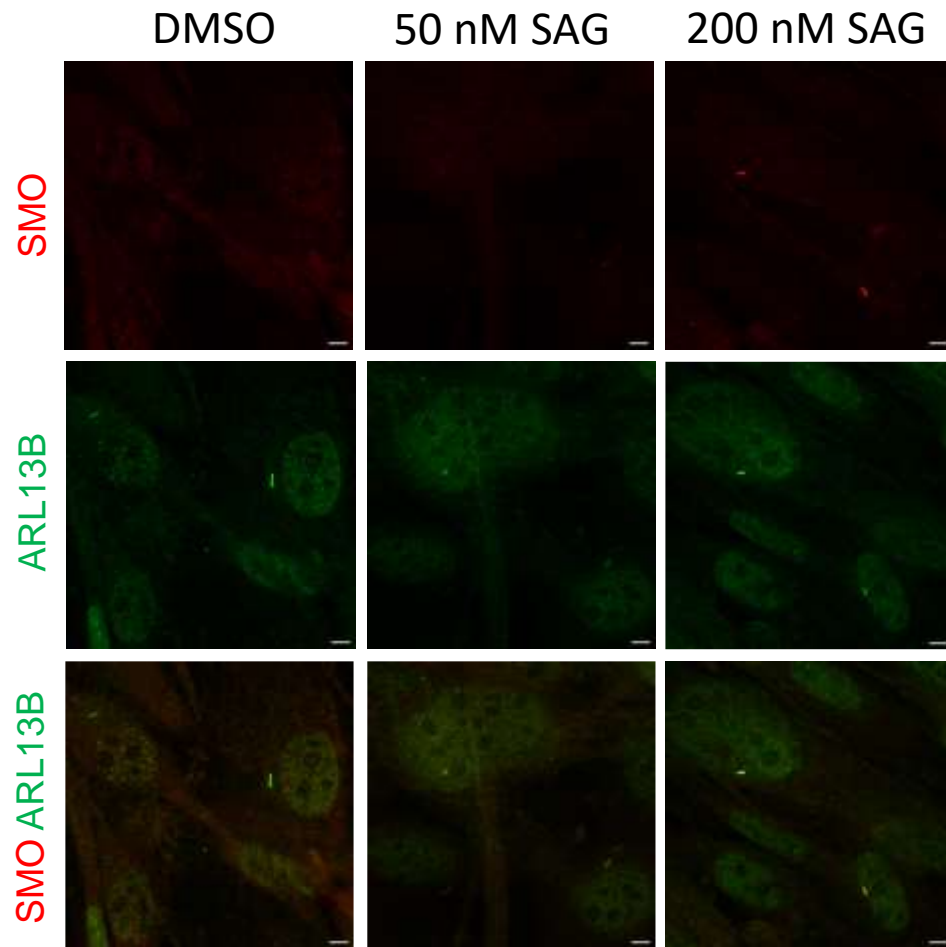

**Supplemental Figure 1:** Smo ciliary localization induced by SAG. MEF cells were treated with either DMSO (control) or the Hh agonist SAG (50 nM, 200 nM). Cells were co-immunolabelled with antibodies against Smo and the cilia marker Arl13B to examine Smo localization in the primary cilium.
